# Supplementary material for: Endowing carbon nanotubes with superparamagnetic properties: applications for cell labeling, MRI cell tracking and magnetic manipulations
Source: Royal Society of Chemistry journal article supplement (doi:10.1039/c3nr00636k), 2013-01-01
Supplement: c3nr00636k.pdf [file c3nr00636k.pdf]

# **Endowing carbon nanotubes with superparamagnetic properties: applications for cell labeling, MRI cell tracking and magnetic manipulations**

Giuseppe Lamanna,<sup>a</sup> Antonio Garofalo,<sup>b</sup> Gabriela Popa,<sup>b</sup> Claire Wilhelm,<sup>c</sup>  
Sylvie Bégin-Colin,<sup>\*b</sup> Delphine Felder-Flesch,<sup>\*b</sup> Alberto Bianco,<sup>\*a</sup> Florence Gazeau<sup>\*c</sup> and  
Cécilia Ménard-Moyon<sup>\*a</sup>

a: CNRS, Institut de Biologie Moléculaire et Cellulaire, Laboratoire d'Immunopathologie et  
Chimie Thérapeutique, UPR 3572, 67000 Strasbourg, France. Fax: +33 388 610680;  
Tel: +33 388 417098; E-mail: a.bianco@ibmc-cnrs.unistra.fr; c.menard@ibmc-cnrs.unistra.fr

b: Institut de Physique et Chimie des Matériaux de Strasbourg IPCMS, UMR CNRS/UdS  
7504, 67034 Strasbourg Cedex 2, France.  
E-mail: delphine.felder@ipcms.unistra.fr; Sylvie.Begin@ipcms.unistra.fr

c: CNRS/Université Paris Diderot, PRES Sorbonne-Paris Cité, Laboratoire Matière et  
Systèmes Complexes (MSC), 75205 Paris cedex 13, France.  
E-mail: florence.gazeau@univ-paris-diderot.fr

## **Electronic Supplementary Information**

## General

FT-IR spectra were obtained on a Digilab FTS 3000 FT-IR spectrometer. The samples were gently ground and mixed with non-absorbent KBr matrices. Dynamic light scattering measurements were performed using a nanosize MALVERN (nano ZS) apparatus.

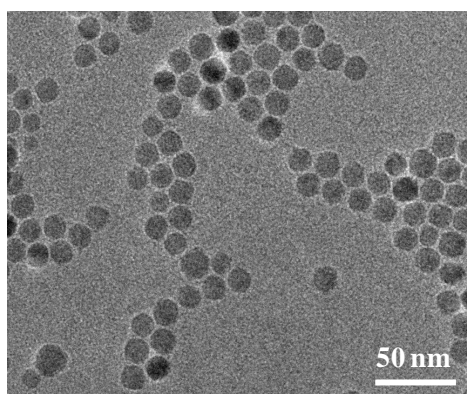

**Figure S1.** TEM images of iron oxide superparamagnetic NPs.

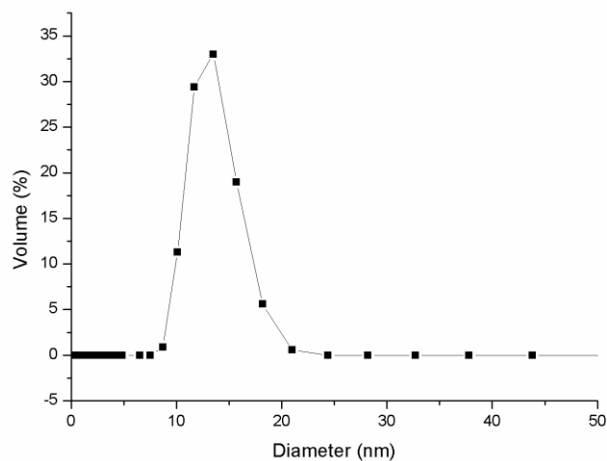

**Figure S2.** Particle size distribution (determined by dynamic light scattering) of iron oxide superparamagnetic NPs in suspension in hexane.

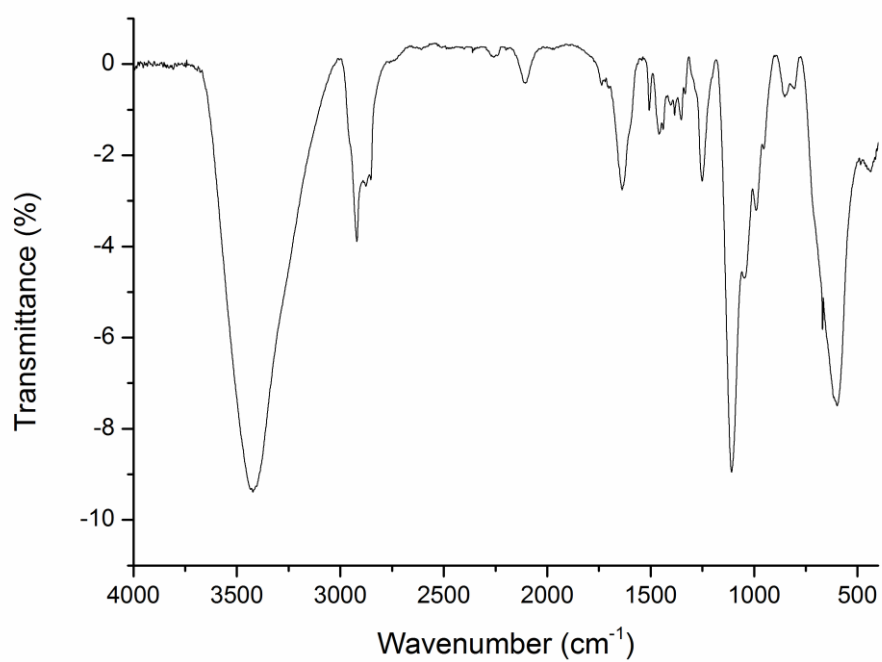

**Figure S3.** FT-IR spectrum of azide-dendron-coated NPs **10**.
